# Supplementary material for: The m15 Locus of Murine Cytomegalovirus Modulates Natural Killer Cell Responses to Promote Dissemination to the Salivary Glands and Viral Shedding
Source: MDPI journal article supplement (doi:10.3390/pathogens10070866), 2021-07-09
Supplement: s1 [file s1]

**Table S1. Primers used for construction of recombinant MCMVs.**

| Virus                 | method                                 | Forward primers                                                                 | Reverse primers                                                                 |
|-----------------------|----------------------------------------|---------------------------------------------------------------------------------|---------------------------------------------------------------------------------|
| MCMV- $\Delta$ m14-16 | ET recombination                       | 5'-ATGCGTCGTCTGGGTATAGTTATTGTCATCGCGTCTCTCCTGAGCGCTGTCGTCGTGGAATGCCTTCGAATTC-3' | 5'-TTAGGATAAAAGTATTGCGTATAAGACACTTATAATTGTCATGATTAAGAACAAGGACGACGACGACAAGTAA-3' |
| MCMV- $\Delta$ m15    | ET recombination                       | 5'-GCGACGATGAGCAGAACATTTGAATCTGATTTATCGATATATGTCCAGACGTCGTGGAATGCCTTCGAATTC-3'  | 5'-TCGAGTACAACGGCAGCTTCGACCACATCAAGCATCA CAAGCTCCCATGACAAGGACGACGACGACAAGTAA-3' |
| MCMV-Rev              | Generation of pST76K-SR-DEST           | 5'-GGGGACAAGTTTGTACAAAAAAGCAGGCTTCGCGATCGTGCTCGTATCTGC-3'                       | 5'-GGGGACCACTTTGTACAAGAAAGCTGGTCATACGTACCCGGTGGGAGAC-3'                         |
| MCMV- $\Delta$ 5'm15  | Seamless ET recombination              | 5'-GATATATTTTACTATATGTGATCGCTCTGTCTAGACCTGCATTGCGTCGTGGAATGCCTTCGAATTC-3'       | 5'-TGGTGGCGAATTATAAGTAGAATTGAATAGAATAGACTGTATAACACAAGGACGACGACGACAAGTAA-3'      |
| MCMV- $\Delta$ 5'm15  | SOE PCR                                | A: 5'-CGGTCGTCTTAGGGGTAA-3'<br>C: 5'-TGTCTAGACCTGCATTGCGCCACCACAATATAGCGG-3'    | B: 5'-CCGCTATATTGTGGTGGCCGAATGCAGGTCTAGACA-3'<br>D: 5'-TTGCGTGTGTGATGCTT-3'     |
| MCMV-m14stop          | 1 <sup>st</sup> round ET recombination | 5'-TAATTCTTATCAATCGCACCAGAGTCTCGTATTTTGATTTCGGAGCGTCGTGGAATGCCTTCGAATTC-3'      | 5'-CTCCGCAGAACTGTTATGTGAAAGGACGTACTGCTTATCAGACGAACAAGGACGACGACGACAAGTAA-3'      |
| MCMV-m14stop          | SOE PCR                                | Primer A: 5'-GGACACGAAAAGAATCAA-3'<br>Primer C: 5'-AGCGCTGTTTAATCTACAGAG-3'     | Primer B: 5'-CTCTGTAGATTAAACAGCGCT-3'<br>Primer D: 5'-ATAGGTTTCGTCCATCTTCGA-3'  |
| MCMV-m15stop          | Seamless ET recombination              | 5'-GATATATTTTACTATATGTGATCGCTCTGTCTAGACCTGCATTGCGTCGTGGAATGCCTTCGAATTC-3'       | 5'-TGGTGGCGAATTATAAGTAGAATTGAATAGAATAGACTGTATAACACAAGGACGACGACGACAAGTAA-3'      |
| MCMV-m15stop          | SOE PCR                                | Primer A: 5'-TCGTCTGATCGATATACC-3'<br>Primer C: 5'-CACGTCCGATAAATTTTA-3'        | Primer B: 5'-TAAATTTATCCGACGTG-3'<br>Primer D: 5'-CAACCTGGGTGATATACA-3'         |
| MCMV-m16stop          | Seamless ET recombination              | 5'-AAATTCAGATTCAAATGTTCTGCTCATCGTCGCCATGAGCCTCCTCGTCGTGGAATGCCTTCGAATTC-3'      | 5'-TCTAAGATCGGTGGTGGTTAGACGCGGTCTTGTGTCCTAGCGTTACAAGGACGACGACGACAAGTAA-3'       |
| MCMV-m16stop          | SOE PCR                                | Primer A: 5'-CGGTCGTCTTAGGGGTAA-3'<br>Primer C: 5'-CCTCGACCTTAAAGATGACA-3'      | Primer B: 5'-TGTCATCTTTAAGGTGAGG-3'<br>Primer D: 5'-CGATTTTCAGACCCTGTT-3'       |
| MCMV-m16stopAl t      | SOE PCR                                | Primer A: 5'-ACCGATATCATATGGATCATC-3'<br>Primer C: 5'-GCTTTGTTTTAACATAGATTT-3'  | Primer B: 5'-AAATCTATGTTAAAACAAAGC-3'<br>Primer D: 5'-TTAGGATAAAAGTATTGC-3'     |
